# Supplementary material for: Gelling Characteristics of Emulsions Prepared with Modified Whey Protein by Multiple-Frequency Divergent Ultrasound at Different Ultrasonic Power and Frequency Mode
Source: MDPI journal article supplement (doi:10.3390/polym14102054), 2022-05-18
Supplement: s1 [file s1]

## Supplementary Materials

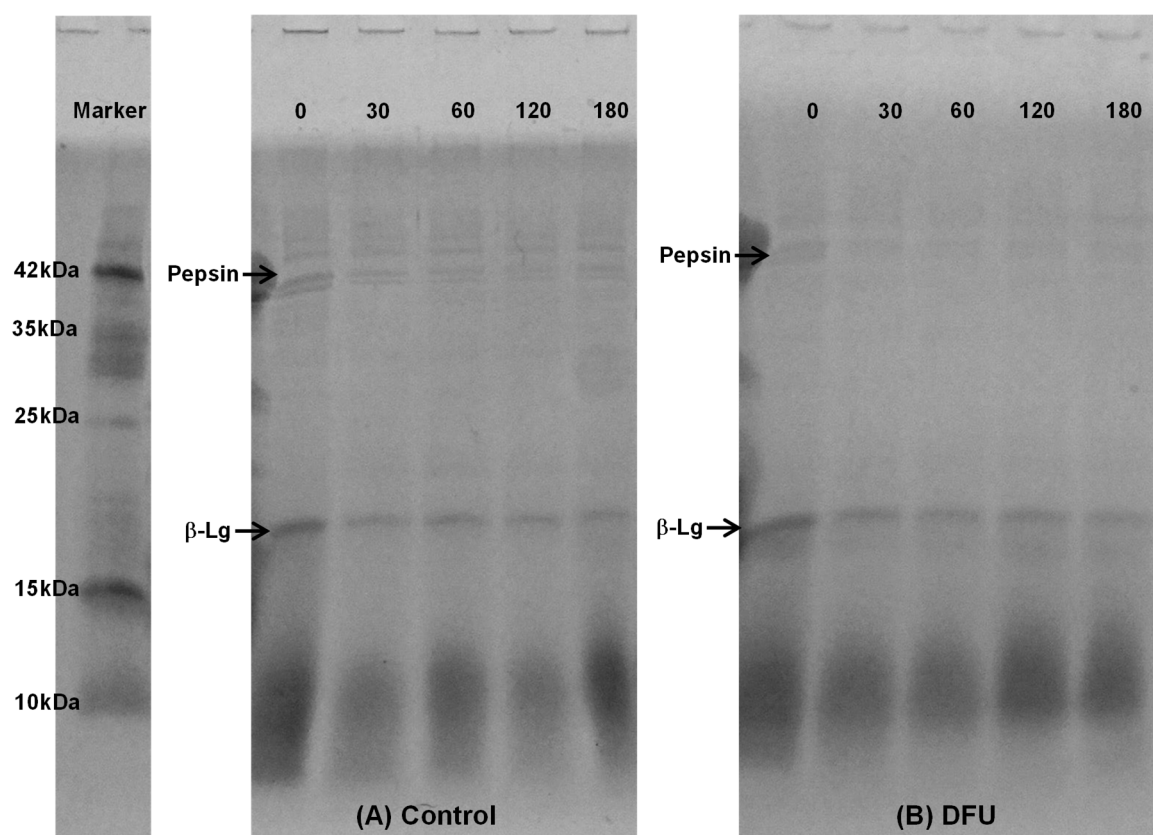

**Figure S1.** SDS-PAGE of (A) control and (B) DFU treated WPEG under gastric digestion at different time digestion points.
